# Supplementary material for: Pterostilbene Attenuates Hexavalent Chromium-Induced Allergic Contact Dermatitis by Preventing Cell Apoptosis and Inhibiting IL-1β-Related NLRP3 Inflammasome Activation
Source: MDPI journal article supplement (doi:10.3390/jcm7120489), 2018-11-27
Supplement: s1 [file s1]

## Supplementary results

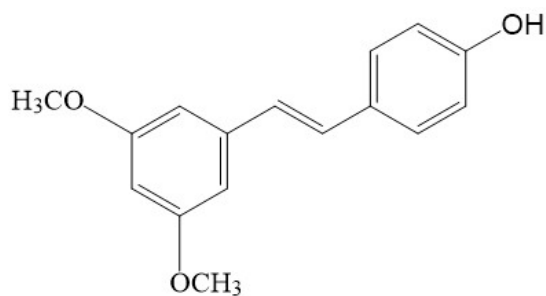

**Figure S1.** Chemical structure of *trans*-3,5-dimethoxy-4'-hydroxystilbene (pterostilbene).

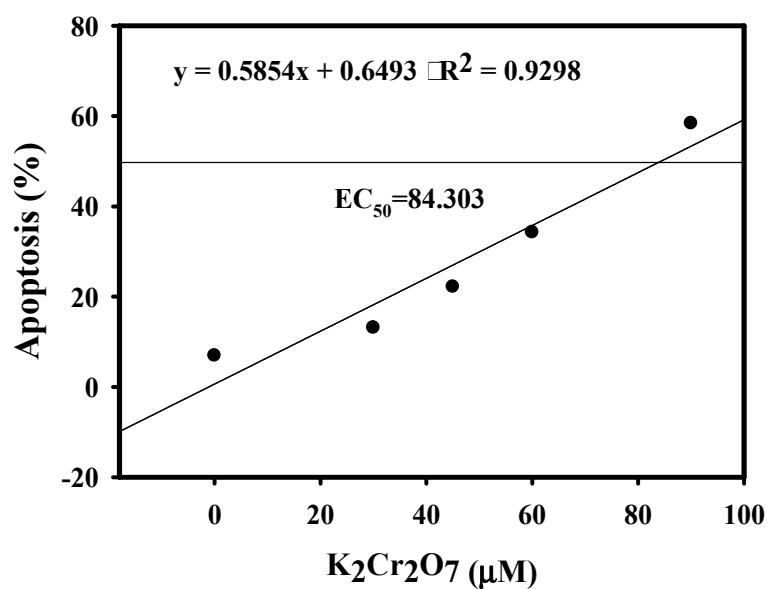

**Figure S2.** Percentage of apoptotic cells determined in different Cr(VI) concentrations. The EC<sub>50</sub> value for apoptosis was 84.303 μM. Data presented as the mean ± standard deviation (SD) from three independent experiments.

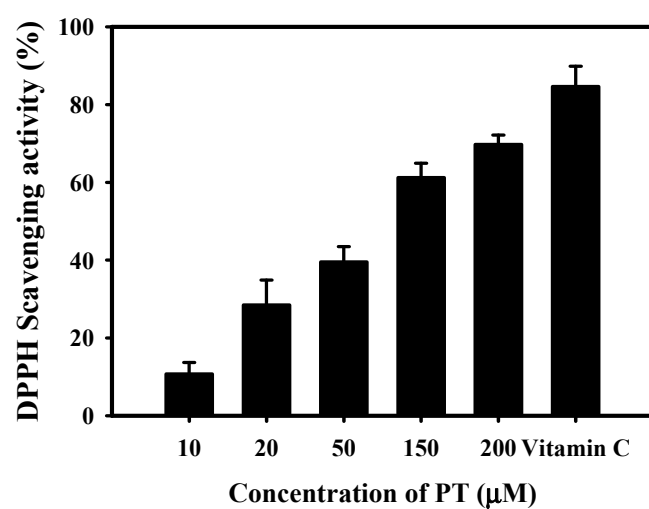

**Figure S3.** DPPH radical scavenging activity of PT. PT antioxidant activity was assessed via the percent inhibition (radical scavenging) of DPPH. Vitamin C (200 μM) was used as a positive control. All tests were performed in triplicate and results are expressed as means  $\pm$  SD.
